# Supplementary material for: Multi-Detector Characterization of Grape Seed Extract to Enable in silico Safety Assessment
Source: PubMed Central journal article supplement (PMC6102626; doi:10.3389/fchem.2018.00334), 2018-08-14
Supplement: Data_Sheet_1.pdf [file Data_Sheet_1.pdf]

## Multi-detector Characterization of Grape Seed Extract to Enable *In Silico* Safety Assessment

Vincent P. Sica,<sup>1</sup> Catherine Mahony,<sup>2</sup> and Timothy R. Baker<sup>1</sup>

<sup>1</sup>Research and Development, Corporate Functions Analytical, The Procter & Gamble Company, Mason Business Center, 8700 Mason-Montgomery Rd, Mason, OH 45040, United States

<sup>2</sup>Central Product Safety, The Procter & Gamble Company Technical Centres Ltd, Egham, United Kingdom

**Figure S1.** The stacked negative mode UHPLC-HRMS chromatograms of the GSE-1 extract, the extracted authentic grape seed (*Vitis vinifera*) material, the extracted authentic peanut skin (*Arachis* sp.) material (green trace), and the extracted authentic pine skin (*Pinus pinaster*) material (blue trace). The GSE-1 and authentic grape seed extracts were in agreement. There were no indications of adulteration in the GSE-1 extract when compared to the peanut skin and pine bark traces.

**Figure S2.** The stacked UHPLC-UV chromatograms of the GSE-1 extract, the extracted authentic grape seed (*Vitis vinifera*) material, the extracted authentic peanut skin (*Arachis* sp.) material (green trace), and the extracted authentic pine skin (*Pinus pinaster*) material (blue trace). The GSE-1 and authentic grape seed extracts were in agreement. There were no indications of adulteration in the GSE-1 extract when compared to the peanut skin and pine bark traces.

**Figure S3.** The narrow mass chromatograms for  $m/z$  575.1189 ( $\pm 5$ ppm) for GSE-1, authentic GSE, authentic peanut skins extract, authentic pine bark extract, and standards of proanthocyanidin A1 and A2 showed that GSE-1 and the authentic grape seed extract did not contain the key indicators of peanut skin and/or pine bark adulteration (proanthocyanidin A-type compounds).

**Figure S4.** (A) Overlay of the GSE-1 (black) and authentic GSE (red) CAD chromatograms from 18-30 minutes, highlighting an outlier in the GSE-1 sample. All other CAD peaks from the GSE-1 are accounted for in the authentic GSE. (B) The negative mode MS/MS spectrum at 23.3 min for the outlier in GSE-1 matched the MS/MS pattern for (C) 1-(3',4'-dihydroxyphenyl)-3-(2'',4'',6''-trihydroxyphenyl)propan-2-ol in literature.

**Figure S5.** A comparison of (A) the proposed structure for a degraded proanthocyanidin dimer based on MS/MS interpretation and (B) an isomer from literature with its reported MS/MS interpretation. Compared to Proanthocyanidin B1, the proposed structure was missing a bond in the B'-ring, while the reported isomer was missing the bond in the B-ring. (C) The MS/MS spectrum of the proposed structure displayed similar types of fragmentation to the isomer in literature, but the differences in structure resulted in different observed masses. NOTE: RDA indicates where the fragment was generated via Retro Diels-Alder.

**Figure S6.** The CAD chromatogram of GSE-1 with each CAD peak labeled. The chromatogram was divided into three sections (0-17, 17-46, and 46-75 min) for clarity. The 39<sup>th</sup> peak is the broad peak ranging from about 18-50 min. The small peaks that are not labeled were below the threshold of toxicological concern.

**Figure S7.** Overlaid UHPLC-CAD chromatograms of the GSE-1 (black trace), GSE-1 treated with poly(vinylpyrrolidone) (PVPP) (green trace), GSE-1 filtered through a molecular weight cut-off

(MWCO) filter at 3000 Da (red trace), and the diluent blank (blue trace) showed the removal of the large chromatographic hump and supported its identity as tannins.

**Figure S8.** The overlaid chromatograms of GSE-1 filtered through a molecular weight cut-off (MWCO) filters at 3,000 Da (black traces), 10,000 Da (red traces), 30,000 Da (green traces), 50,000 Da (blue traces), and 100,000 Da (yellow traces). The top chromatograms represent the filtrate (passed through filter) and the bottom chromatograms represent the retentate (didn't pass through filter).

**Figure S9.** The retentate from the GSE after passing through a 30,000 MWCO filter was subjected to ESI-QTOF. With a collision energy (CE) of 10V, signals indicating high molecular weight tannin species was detected (top). As the CE was increased, fragments relating to sugars ( $m/z$  162), catechin ( $m/z$  288), and catechin-polymers ( $m/z$  576, 864, etc.) were detected, further supporting the evidence for tannins.

**Figure S10.** The calibration curves generated by area under the curve (AUC) from the CAD chromatograms for the four standards (top) compared to the isolated tannins (bottom). To the right of each are the averages all the calculated response factors (AUC/concentration) and their respective standard deviations.

**Figure S11.** (A) The CAD and (B) UV (280 nm) chromatographic profiles for the authenticated GSE voucher and the various extracts from different suppliers.

**Table S1.** Proposed identifications of components producing CAD peaks in the UHPLC-UV-CAD-HRMS/MS analysis of grape seed (*Vitis vinifera*) extract for GSE-1.

**Table S2.** Proposed identifications of components producing FID peaks in the GC-FID and GC-HRMS analysis of grape seed (*Vitis vinifera*) extract for GSE-1.

## Supplemental Information

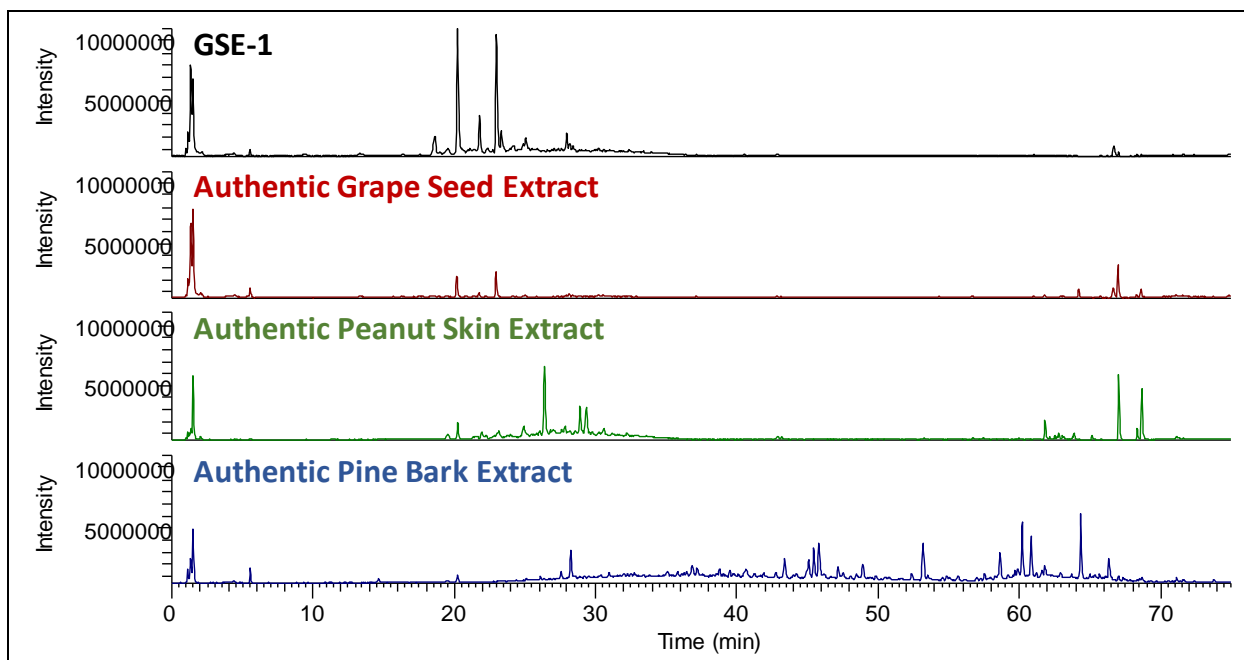

**Figure S1.** The stacked negative mode UHPLC-HRMS chromatograms of the GSE-1 extract, the extracted authentic grape seed (*Vitis vinifera*) material, the extracted authentic peanut skin (*Arachis* sp.) material (green trace), and the extracted authentic pine skin (*Pinus pinaster*) material (blue trace). The GSE-1 and authentic grape seed extracts were in agreement. There were no indications of adulteration in the GSE-1 extract when compared to the peanut skin and pine bark traces.

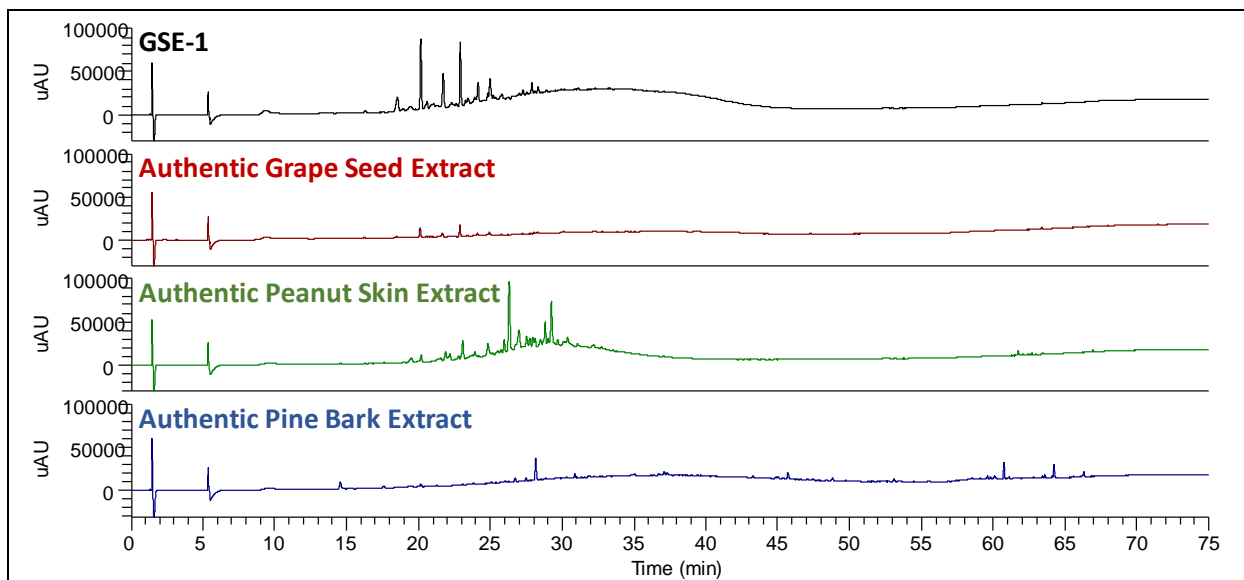

**Figure S2.** The stacked UHPLC-UV chromatograms of the GSE-1 extract, the extracted authentic grape seed (*Vitis vinifera*) material, the extracted authentic peanut skin (*Arachis* sp.) material (green trace), and the extracted authentic pine skin (*Pinus pinaster*) material (blue trace). The GSE-1 and authentic grape seed extracts were in agreement. There were no indications of adulteration in the GSE-1 extract when compared to the peanut skin and pine bark traces.

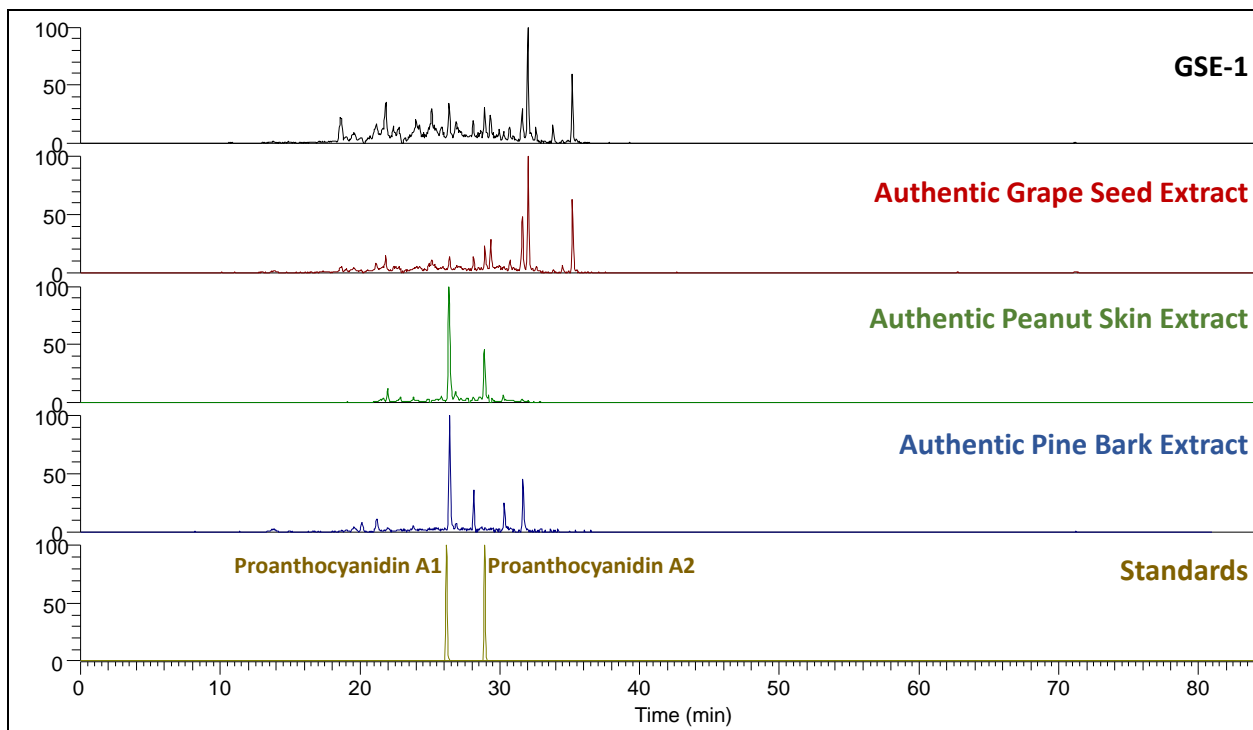

**Figure S3.** The narrow mass chromatograms for  $m/z$  575.1189 ( $\pm 5$  ppm) for GSE-1, authentic GSE, authentic peanut skins extract, authentic pine bark extract, and standards of proanthocyanidin A1 and A2 showed that GSE-1 and the authentic grape seed extract did not contain the key indicators of peanut skin and/or pine bark adulteration (proanthocyanidin A-type compounds).

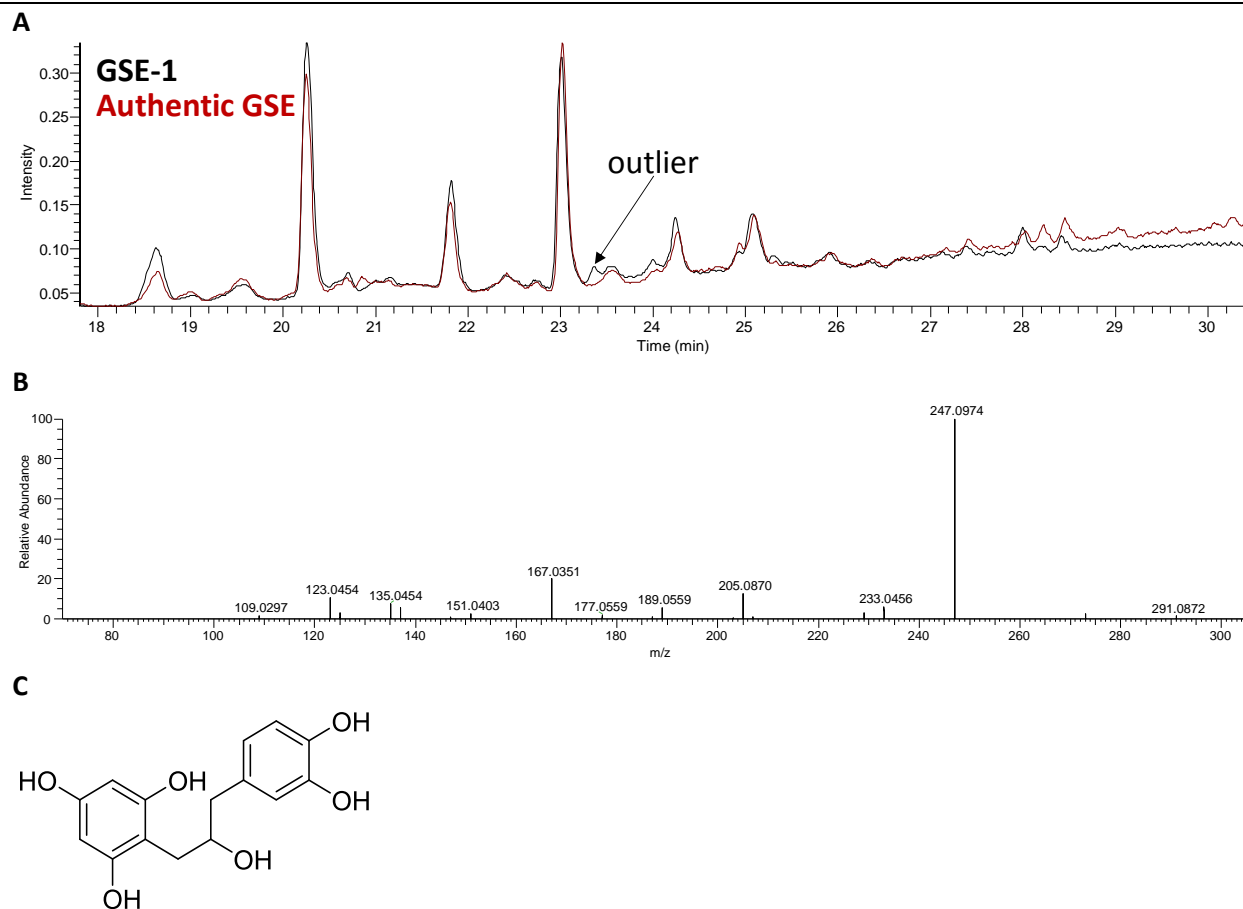

**Figure S4.** (A) Overlay of the GSE-1 (black) and authentic GSE (red) CAD chromatograms from 18-30 minutes, highlighting an outlier in the GSE-1 sample. All other CAD peaks from the GSE-1 are accounted for in the authentic GSE. (B) The negative mode MS/MS spectrum at 23.3 min for the outlier in GSE-1 matched the MS/MS pattern for (C) 1-(3',4'-dihydroxyphenyl)-3-(2'',4'',6''-trihydroxyphenyl)propan-2-ol in literature.<sup>19</sup>

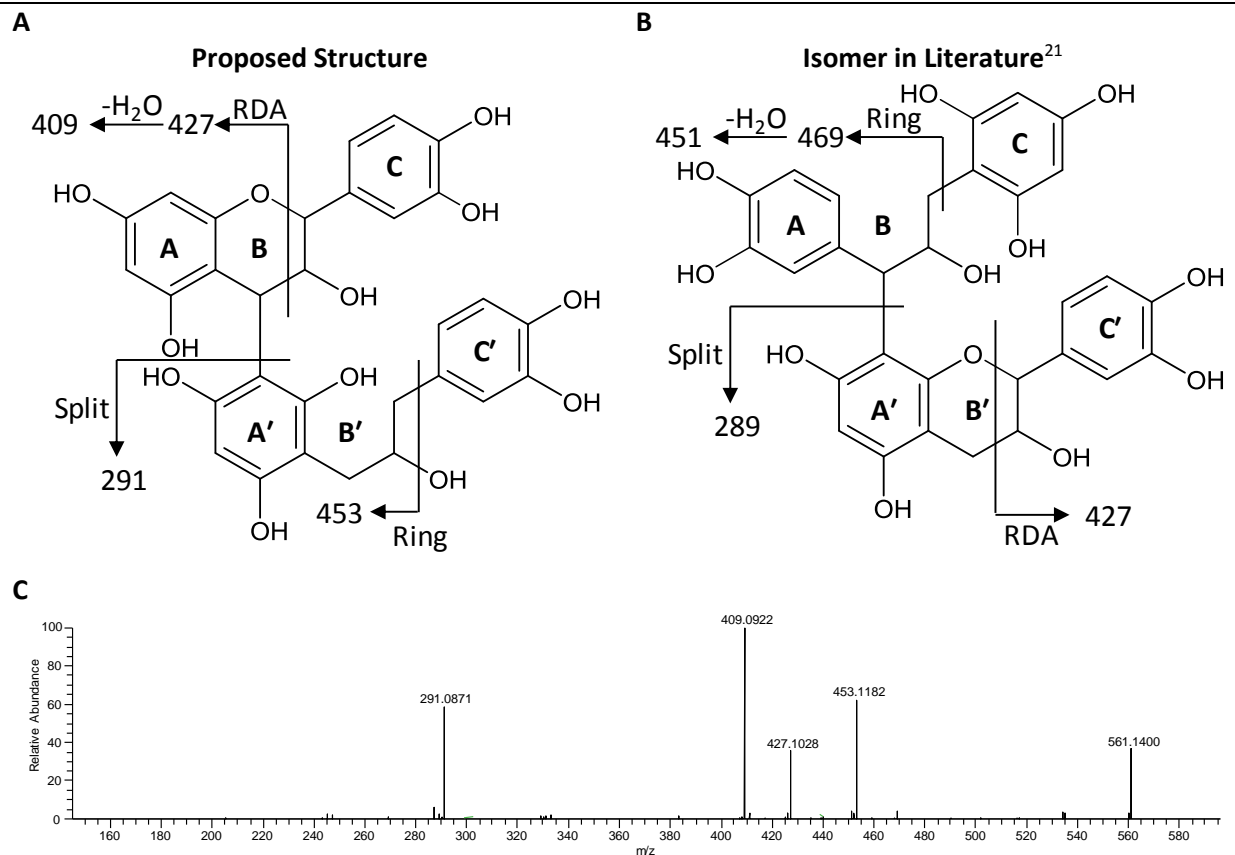

**Figure S5.** A comparison of (A) the proposed structure for a degraded proanthocyanidin dimer based on MS/MS interpretation and (B) an isomer from literature with its reported MS/MS interpretation.<sup>21</sup> Compared to Proanthocyanidin B1, the propose structure was missing a bond in the B'-ring, while the reported isomer was missing the bond in the B-ring. (C) The MS/MS spectrum of the proposed structure displayed similar types of fragmentation to the isomer in literature,<sup>21</sup> but the differences in structure resulted in different observed masses. NOTE: RDA indicates where the fragment was generated via Retro Diels-Alder.

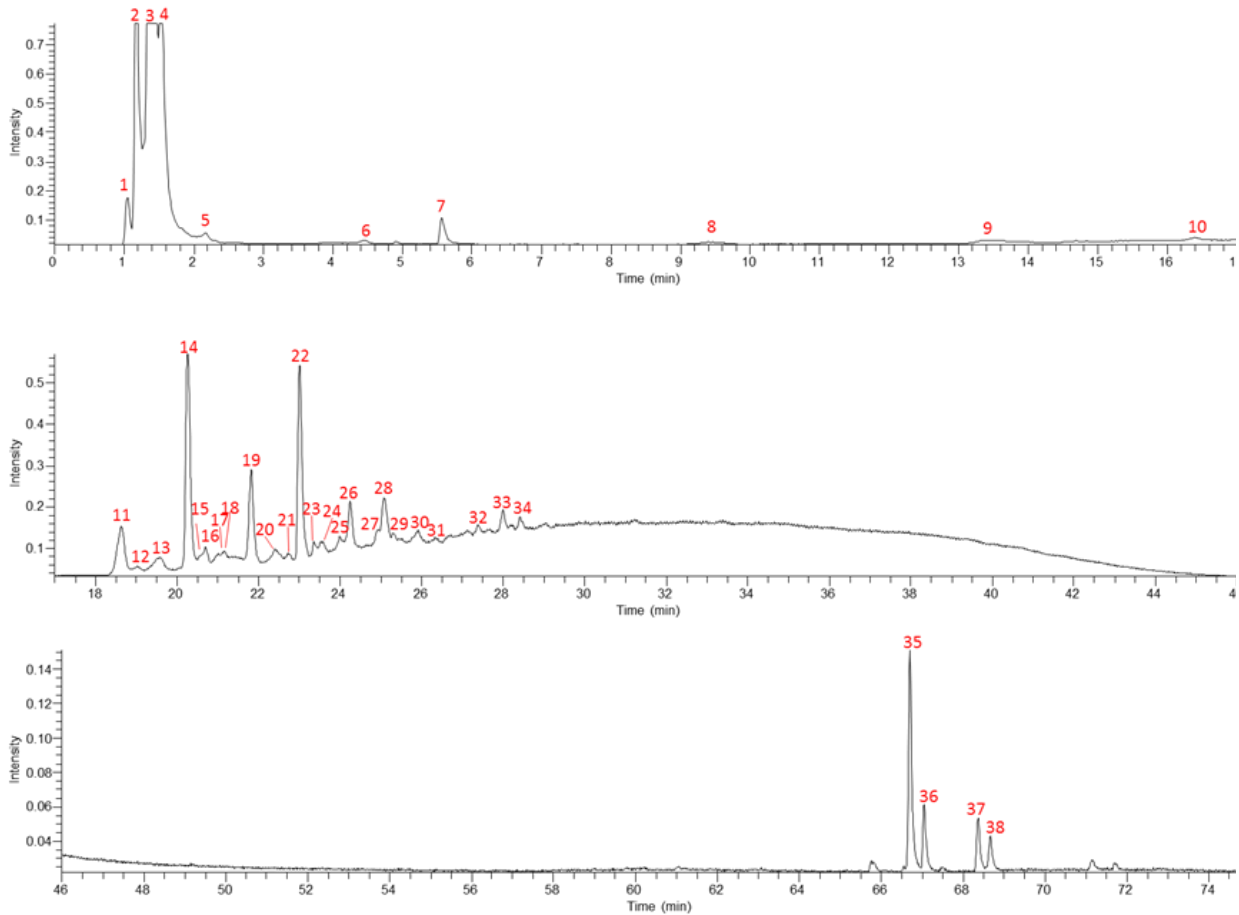

**Figure S6.** The CAD chromatogram of GSE-1 with each CAD peak labeled. The chromatogram was divided into three sections (0-17, 17-46, and 46-75 min) for clarity. The 39<sup>th</sup> peak is the broad peak ranging from about 18-50 min. The small peaks that are not labeled were below the threshold of toxicological concern.



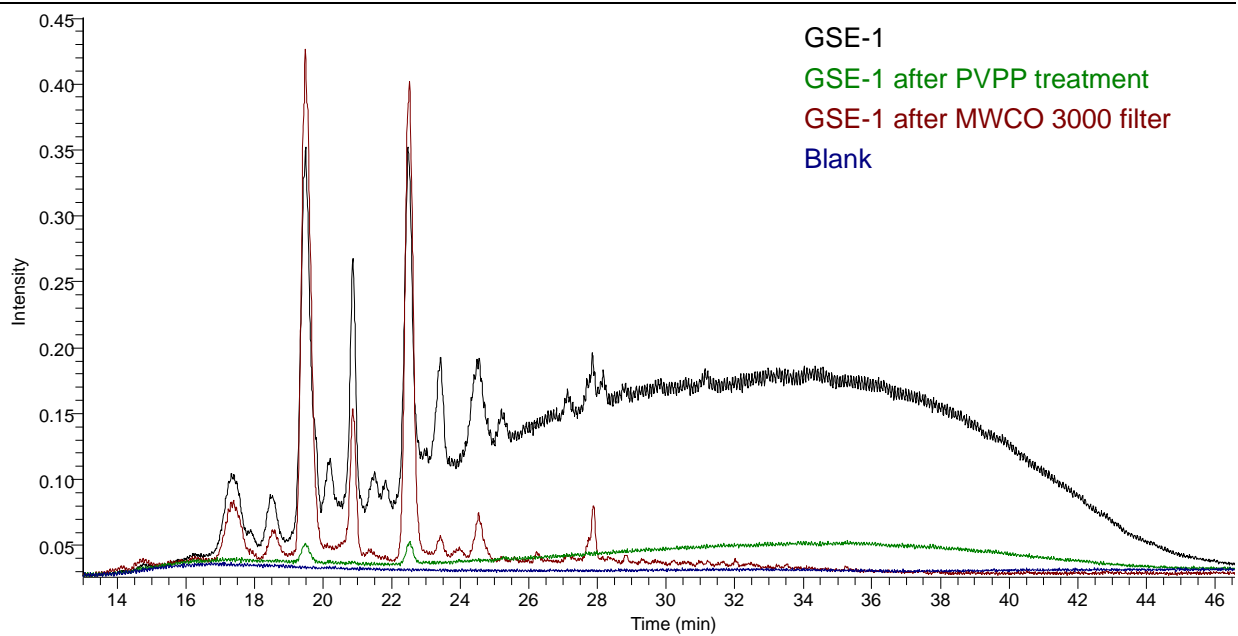

**Figure S7.** Overlaid UHPLC-CAD chromatograms of the GSE-1 (black trace), GSE-1 treated with poly(vinylpyrrolidone) (PVPP) (green trace), GSE-1 filtered through a molecular weight cut-off (MWCO) filter at 3000 Da (red trace), and the diluent blank (blue trace) showed the removal of the large chromatographic hump and supported its identity as tannins.

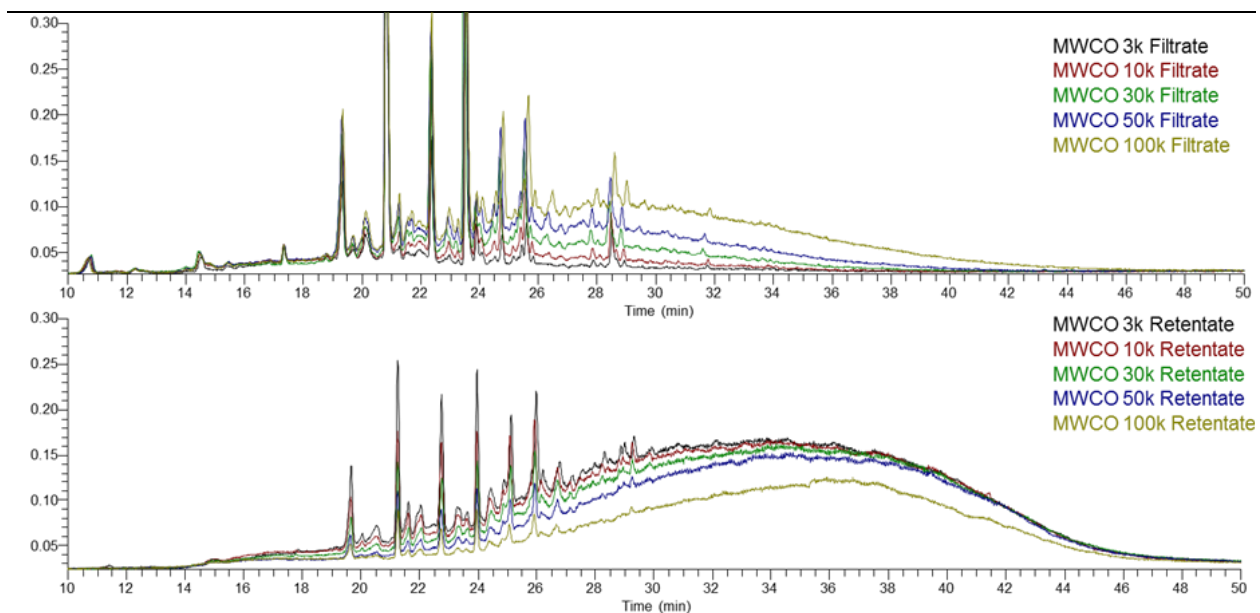

**Figure S8.** The overlaid chromatograms of GSE-1 filtered through a molecular weight cut-off (MWCO) filters at 3,000 Da (black traces), 10,000 Da (red traces), 30,000 Da (green traces), 50,000 Da (blue traces), and 100,000 Da (yellow traces). The top chromatograms represent the filtrate (passed through filter) and the bottom chromatograms represent the retentate (didn't pass through filter).

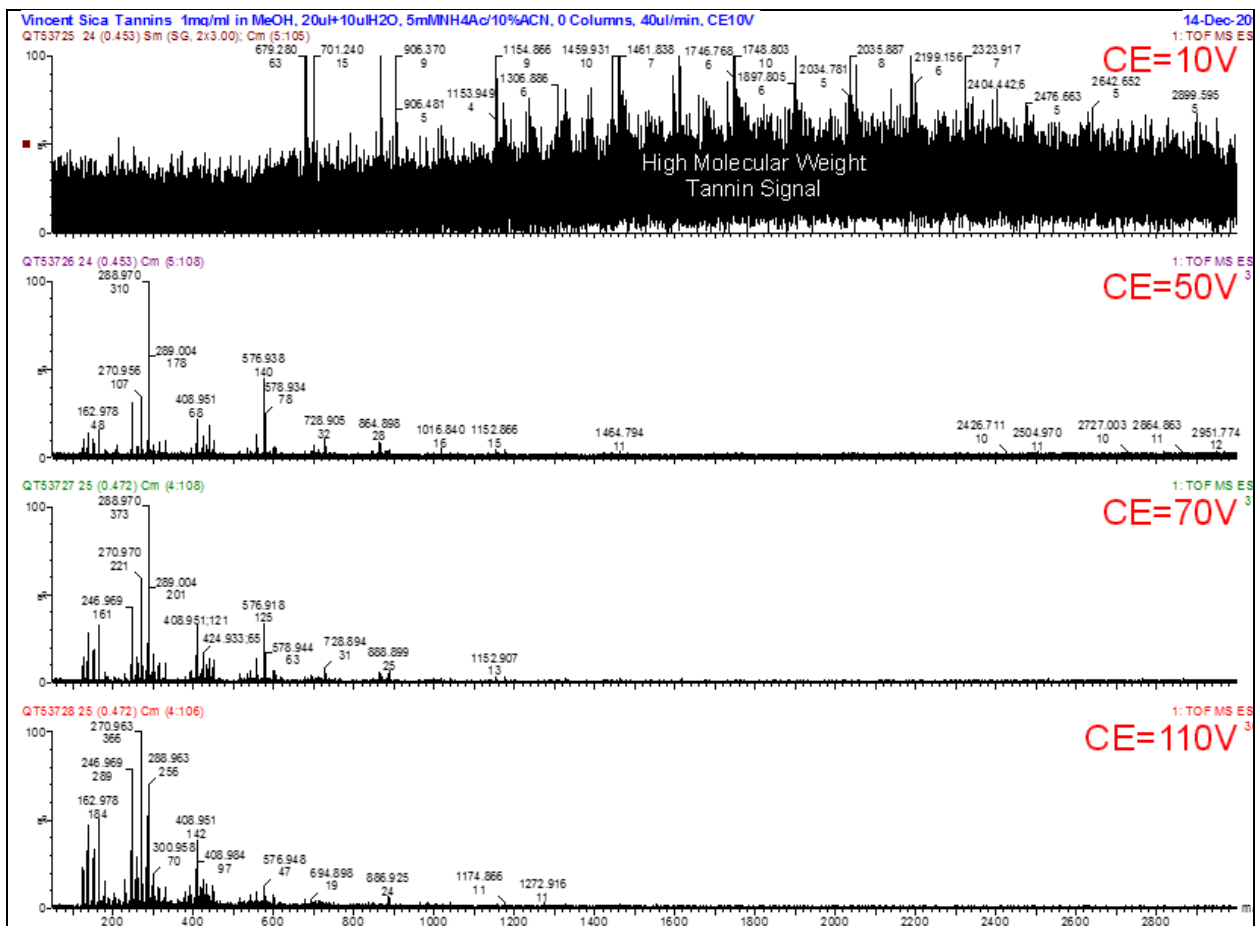

**Figure S9.** The retentate from the GSE after passing through a 30,000 MWCO filter was subjected to ESI-QTOF. With a collision energy (CE) of 10V, signals indicating high molecular weight tannin species was detected (top). As the CE was increased, fragments relating to sugars ( $m/z$  162), catechin ( $m/z$  288), and catechin-polymers ( $m/z$  576, 864, etc.) were detected, further supporting the evidence for tannins.

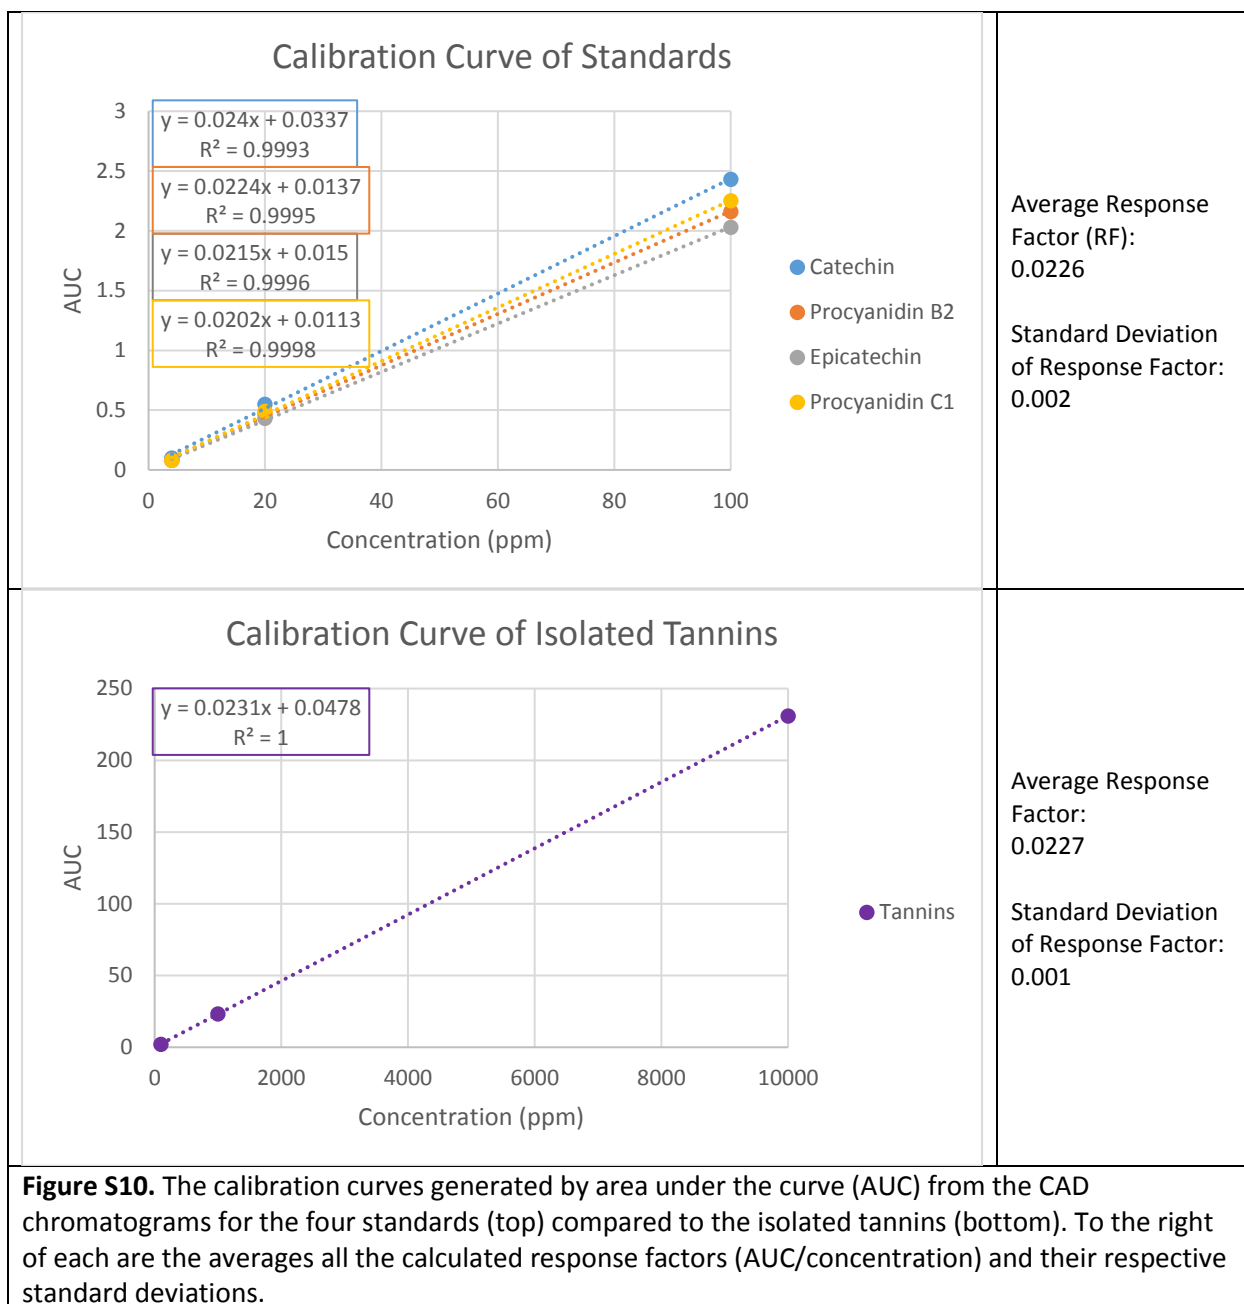

**Figure S10.** The calibration curves generated by area under the curve (AUC) from the CAD chromatograms for the four standards (top) compared to the isolated tannins (bottom). To the right of each are the averages all the calculated response factors (AUC/concentration) and their respective standard deviations.

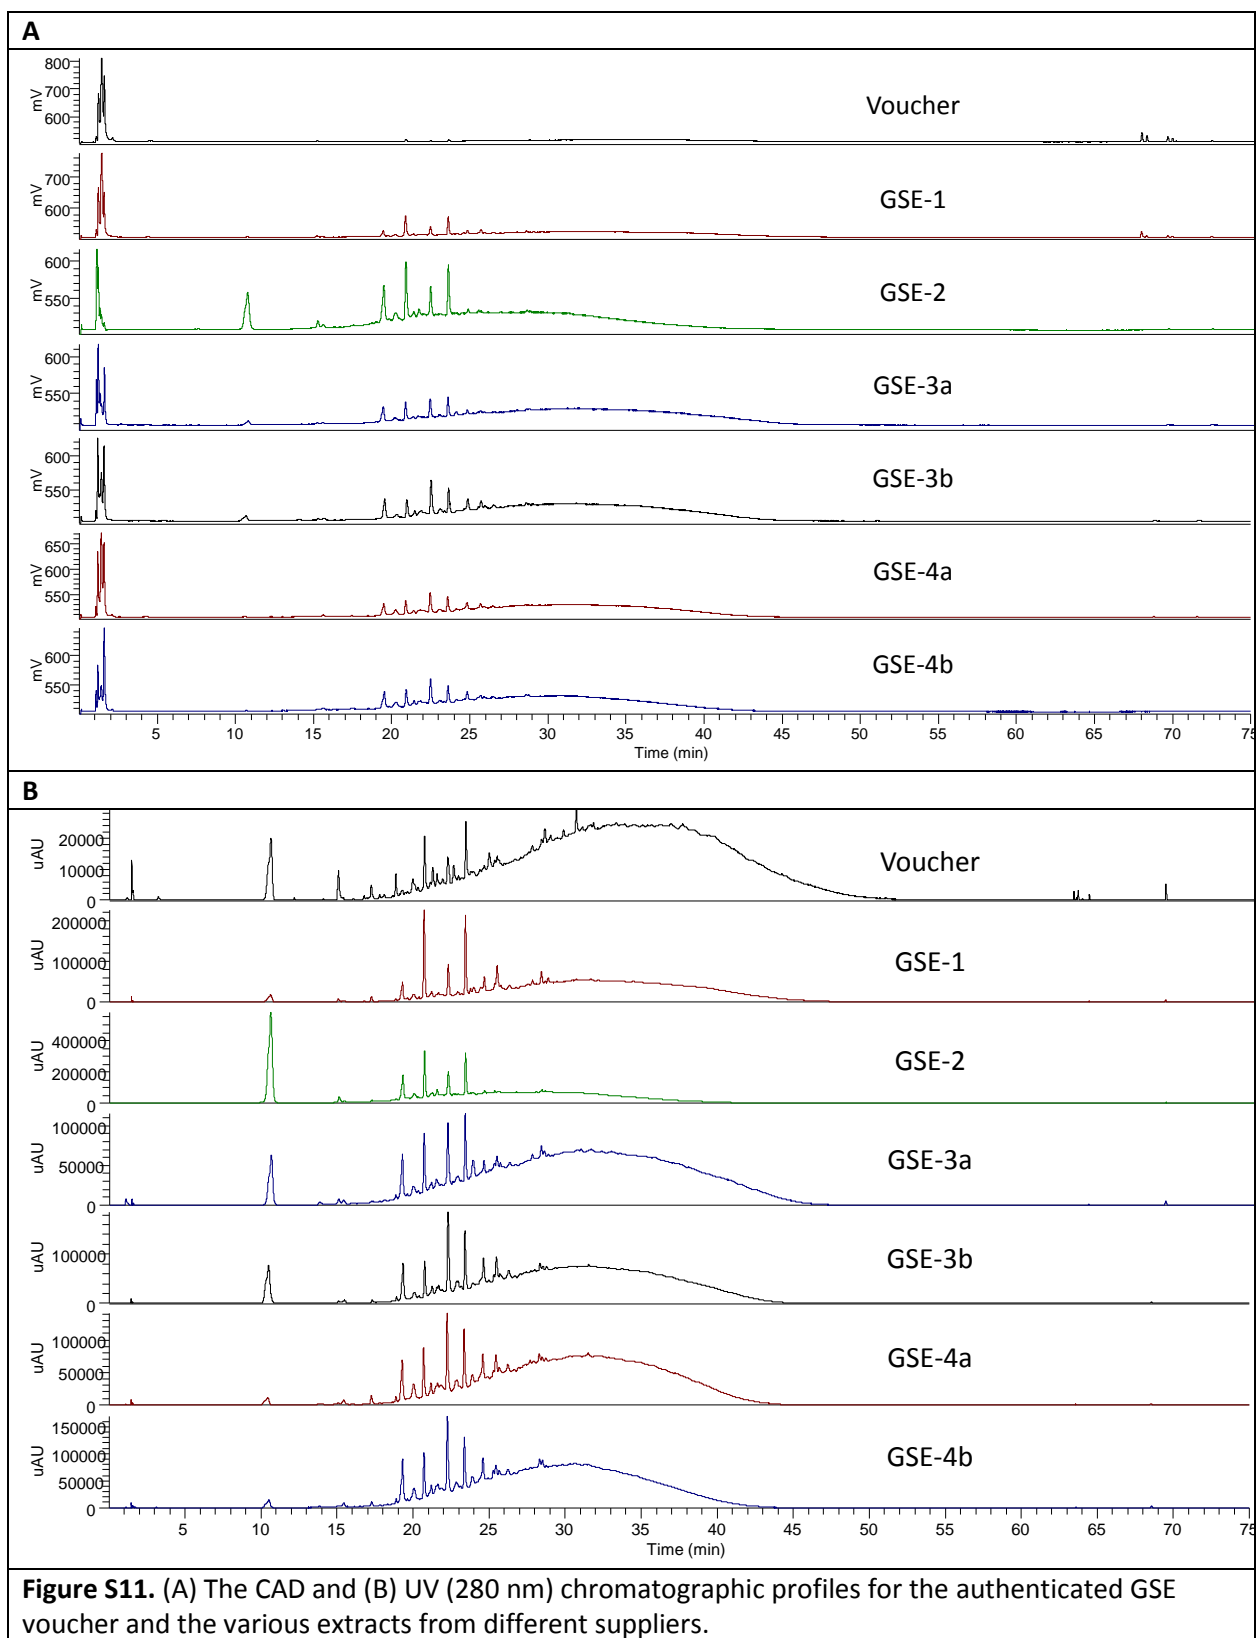

**Table S1.** Proposed identifications of components producing CAD peaks in the UHPLC-UV-CAD-HRMS/MS analysis of grape seed (*Vitis vinifera*) extract for GSE-1.

| CAD Peak | RT (min) | Exp. <i>m/z</i> -, top +, bottom | Mass Acc. (ppm) -, top +, bottom | Proposed ID Molecular Formula                                                         | Structure        | High Resolution Fragments <sup>(1)</sup> ( <i>m/z</i> intensity) |
|----------|----------|----------------------------------|----------------------------------|---------------------------------------------------------------------------------------|------------------|------------------------------------------------------------------|
| 1a       | 1.04     | 158.9781                         | 3.441                            | Magnesium salts                                                                       | Mg <sup>2+</sup> |                                                                  |
| 1b       |          | 110.0084                         | -3.153                           |                                                                                       |                  |                                                                  |
| 2a       | 1.18     | 174.9566                         | 2.788                            | Calcium salts                                                                         | Ca <sup>2+</sup> |                                                                  |
| 2b       |          | 125.9859                         | -2.430                           |                                                                                       |                  |                                                                  |
| 3a       | 1.37     | 112.9858                         | 1.712                            | Sodium salts                                                                          | Na <sup>+</sup>  |                                                                  |
| 2a       |          | 190.9117                         | -1.381                           |                                                                                       |                  |                                                                  |
| 2b       |          | 128.9598                         | 1.832                            | Potassium salts                                                                       | K <sup>+</sup>   |                                                                  |
| 3a       |          | 179.0555                         | -2.576                           |                                                                                       |                  |                                                                  |
| 3b       |          | 203.0524                         | -1.178                           |                                                                                       |                  |                                                                  |
| 3b       | 195.0502 | -3.927                           | Gluconic Acid                    | 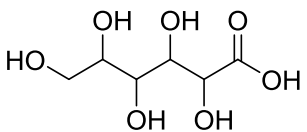   | Negative         |                                                                  |
| 3c       | 146.0456 | -3.435                           | Glutamic Acid                    |   | Positive         |                                                                  |
| 3d       | N/A      | N/A                              | Choline hexoside                 |  | Positive         |                                                                  |
| 3e       | N/A      | N/A                              | Arginyl fructose                 |  | Positive         |                                                                  |

| CAD Peak | RT (min)        | Exp. <i>m/z</i> -, top +, bottom    | Mass Acc. (ppm) -, top +, bottom    | Proposed ID<br>Molecular Formula                                    | Structure                                                  | High Resolution Fragments <sup>(1)</sup><br>( <i>m/z</i> intensity)                                      |
|----------|-----------------|-------------------------------------|-------------------------------------|---------------------------------------------------------------------|------------------------------------------------------------|----------------------------------------------------------------------------------------------------------|
| 3f       |                 | N/A<br>325.1122                     | N/A<br>-1.917                       | Cellobiosan<br>C <sub>12</sub> H <sub>20</sub> O <sub>10</sub>      |                                                            | Positive<br>145.0497 (11), 253.0712 (14), 271.0824 (19),<br>289.0910 (24), 306.1184 (100), 307.1151 (94) |
| 3g       |                 | N/A<br>118.0860                     | N/A<br>-2.923                       | Isovaline<br>C <sub>5</sub> H <sub>11</sub> NO <sub>2</sub>         |                                                            | Positive<br>72.0807 (100), 101.0598 (15)                                                                 |
| 4a       |                 | 149.0087<br>N/A                     | -3.028<br>N/A                       | Tartaric Acid<br>C <sub>4</sub> H <sub>6</sub> O <sub>6</sub>       |                                                            | Negative<br>59.0140 (65), 87.0089 (100), 103.0038 (95),<br>130.9988 (42), 149.0094 (17)                  |
| 4b       | 1.53            | 341.1073<br>365.1052 <sup>(6)</sup> | -4.880<br>-0.582                    | Disaccharide<br>C <sub>12</sub> H <sub>22</sub> O <sub>11</sub>     |                                                            | Negative<br>89.0246 (18), 113.0246 (23), 119.0352 (14),<br>143.0353 (26), 161.0459 (26), 179.0563 (100)  |
| 4c       |                 | N/A<br>116.0703                     | N/A<br>-2.456                       | Proline<br>C <sub>5</sub> H <sub>9</sub> NO <sub>2</sub>            |                                                            | Positive<br>70.0651 (100)                                                                                |
| 4d       |                 | N/A<br>138.0546                     | N/A<br>-2.644                       | N-methylnicotinate<br>C <sub>7</sub> H <sub>7</sub> NO <sub>2</sub> |                                                            | Positive<br>94.0649 (100)                                                                                |
| 5a       |                 | 2.17                                | 133.0139<br>157.0107 <sup>(6)</sup> | -2.380<br>-0.092                                                    | Malic Acid<br>C <sub>4</sub> H <sub>6</sub> O <sub>5</sub> |                                                                                                          |
| 5b       | N/A<br>306.9972 |                                     | N/A<br>N/A                          | Unidentified                                                        |                                                            | Positive<br>172.9760 (4), 244.9968 (7), 270.9764 (8),<br>288.9866 (100)                                  |

| CAD Peak | RT (min) | Exp. $m/z$<br>-, top<br>+, bottom   | Mass Acc. (ppm)<br>-, top<br>+, bottom | Proposed ID<br>Molecular Formula                | Structure                                                                             | High Resolution Fragments <sup>(1)</sup><br>( $m/z$ intensity)                         |
|----------|----------|-------------------------------------|----------------------------------------|-------------------------------------------------|---------------------------------------------------------------------------------------|----------------------------------------------------------------------------------------|
| 6a       | 4.46     | 191.0192<br>215.0162 <sup>(6)</sup> | -2.857<br>0.122                        | Citric Acid<br>$C_6H_8O_7$                      | 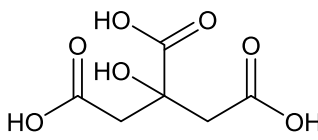   | Negative<br>111.0089 (100), 173.0092 (13)<br>Positive<br>169.0110 (56), 197.0059 (100) |
| 6b       |          | 128.0355<br>130.0498                | 1.747<br>0.122                         | Pyroglutamic Acid<br>$C_6H_8O_7$                |    | Positive<br>84.0444 (100)                                                              |
| 7a       | 5.56     | 117.0189<br>N/A                     | -2.922<br>N/A                          | Succinic Acid<br>$C_4H_6O_4$                    |    | Negative<br>73.0296 (100), 99.0088 (53)                                                |
| 7b       |          | 180.0659<br>182.0807                | -3.812<br>-2.470                       | Tyrosine<br>$C_9H_{11}NO_3$                     |    | Positive<br>136.0758 (23), 165.0547 (100)                                              |
| 7c       |          | 243.0611<br>N/A                     | -4.770<br>N/A                          | Uridine<br>$C_9H_{12}N_2O_6$                    |   | Negative<br>110.0249 (12), 140.0355 (4), 152.0356 (9),<br>174.9561 (6), 200.0566 (100) |
| 7d       |          | N/A<br>332.1329                     | N/A<br>-3.171                          | Glucopyranosyl pyridoxine<br>$C_{14}H_{21}NO_8$ |  | Positive<br>152.0708 (6), 170.0813 (7), 314.1236 (100)                                 |
| 7e       |          | N/A<br>268.1032                     | N/A<br>-2.684                          | Adenosine<br>$C_{10}H_{14}N_5O_4$               |  | Positive<br>136.0618 (100)                                                             |



| CAD Peak | RT (min) | Exp. <i>m/z</i> -, top +, bottom | Mass Acc. (ppm) -, top +, bottom | Proposed ID<br>Molecular Formula                                              | Structure                                                                             | High Resolution Fragments <sup>(1)</sup><br>( <i>m/z</i> intensity)                                                 |
|----------|----------|----------------------------------|----------------------------------|-------------------------------------------------------------------------------|---------------------------------------------------------------------------------------|---------------------------------------------------------------------------------------------------------------------|
| 7f       |          | N/A<br>294.1537                  | N/A<br>-3.972                    | Leucine-Fructose<br>C <sub>12</sub> H <sub>23</sub> NO <sub>7</sub>           | 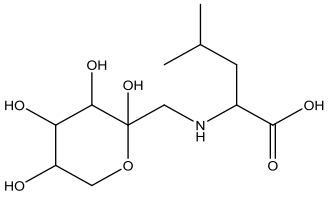   | Positive<br>276.1445 (100)<br><br>MS <sup>3</sup><br>132.1021 (12), 230.1390 (44),<br>248.1495 (26), 258.1339 (100) |
| 7g       |          | 251.0760<br>N/A                  | -4.782<br>N/A                    | Unidentified<br>C <sub>9</sub> H <sub>16</sub> O <sub>8</sub>                 |                                                                                       | Negative<br>151.0612 (100), 204.9751 (6), 232.0472 (7)                                                              |
| 7h       |          | 253.0916<br>N/A                  | -4.705<br>N/A                    | Unidentified<br>C <sub>9</sub> H <sub>18</sub> O <sub>8</sub>                 |                                                                                       | Negative<br>207.0874 (100)                                                                                          |
| 7i       |          | 289.0663<br>N/A                  | -4.873<br>N/A                    | Unidentified<br>C <sub>10</sub> H <sub>14</sub> O <sub>8</sub> N <sub>2</sub> |                                                                                       | Negative<br>174.9561 (55), 188.9494 (97), 221.0669<br>(100), 243.0623 (75), 271.0947 (23)                           |
| 7j       |          | N/A<br>229.1541                  | N/A<br>-2.440                    | Unidentified<br>C <sub>11</sub> H <sub>21</sub> N <sub>2</sub> O <sub>3</sub> |                                                                                       | Positive<br>70.0648 (5), 124.0754 (8), 142.0867 (100),<br>170.0813 (8), 211.1444 (3)                                |
| 7k       |          | N/A<br>241.1541                  | N/A<br>-2.318                    | Unidentified<br>C <sub>12</sub> H <sub>21</sub> N <sub>2</sub> O <sub>3</sub> |                                                                                       | Positive<br>84.0807 (6), 128.1071 (24), 144.1022 (15),<br>194.0814 (29), 196.0970 (100), 213.1601 (5)               |
| 7l       |          | N/A<br>314.0909                  | N/A<br>-4.658                    | Unidentified<br>C <sub>19</sub> H <sub>12</sub> N <sub>3</sub> O <sub>2</sub> |                                                                                       | Positive<br>97.0284 (8), 136.0620 (100), 143.0165 (4),<br>161.0269 (3), 179.0376 (8), 296.0817 (92)                 |
| 8        | 9.46     | 169.0137<br>171.0288             | -3.234<br>-0.057                 | Gallic acid<br>C <sub>7</sub> H <sub>6</sub> O <sub>5</sub>                   |  | Negative<br>125.0245 (100), 169.0143 (25)                                                                           |
| 9a       | 13.39    | 331.0655<br>333.0815             | -4.863<br>-0.520                 | Glucogallin<br>C <sub>13</sub> H <sub>16</sub> O <sub>10</sub>                |  | Negative<br>169.0142 (100)<br><br>MS <sup>3</sup><br>125.0246 (100)                                                 |

| CAD Peak | RT (min) | Exp. <i>m/z</i><br>-, top<br>+, bottom | Mass Acc. (ppm)<br>-, top<br>+, bottom | Proposed ID<br>Molecular Formula                                            | Structure                                                                             | High Resolution Fragments <sup>(1)</sup><br>( <i>m/z</i> intensity)                                                                       |
|----------|----------|----------------------------------------|----------------------------------------|-----------------------------------------------------------------------------|---------------------------------------------------------------------------------------|-------------------------------------------------------------------------------------------------------------------------------------------|
| 9b       |          | N/A<br>206.5312 <sup>(5)</sup>         | N/A<br>N/A                             | Unidentified                                                                |                                                                                       | Positive<br>186.0182 (42), 195.0235 (100), 204.0289 (25)                                                                                  |
| 10       | 16.39    | 203.0818<br>205.0969                   | -3.698<br>-1.337                       | Tryptophan<br>C <sub>11</sub> H <sub>12</sub> N <sub>2</sub> O <sub>2</sub> | 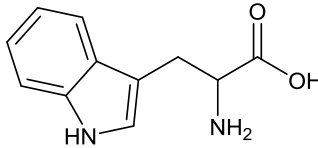   | Negative<br>116.0507 (32), 142.0663 (11),<br>159.0930 (100), 186.056 (12)<br><br>Positive<br>188.0706 (100)                               |
| 11       | 18.62    | 577.1350<br>579.1482                   | -0.293<br>-2.543                       | Procyanidin B1<br>C <sub>30</sub> H <sub>26</sub> O <sub>12</sub>           |    | Negative<br>289.0719 (40), 407.0774 (76), 408.0805 (14),<br>425.0875 (100), 451.1033 (42), 559.1244 (10)                                  |
| 12       | 19.02    | 577.1347<br>579.1485                   | -0.848<br>-2.077                       | Procyanidin B<br>C <sub>30</sub> H <sub>26</sub> O <sub>12</sub>            |   | Negative<br>269.0455 (17), 289.0719 (24), 407.0774 (40),<br>425.0875 (100), 439.1030 (42),<br>451.1033 (21), 533.1451 (21), 559.1244 (23) |
| 13       | 19.57    | 577.1346<br>579.1479                   | -0.865<br>-3.130                       | Procyanidin B<br>C <sub>30</sub> H <sub>26</sub> O <sub>12</sub>            |  | Negative<br>289.0719 (40), 407.0774 (76), 408.0805 (14),<br>425.0875 (100), 451.1033 (42), 559.1244 (10)                                  |

| CAD Peak | RT (min) | Exp. <i>m/z</i> -, top +, bottom    | Mass Acc. (ppm) -, top +, bottom | Proposed ID Molecular Formula                                                   | Structure                                                                             | High Resolution Fragments <sup>(1)</sup> ( <i>m/z</i> intensity)                                                                                                                          |
|----------|----------|-------------------------------------|----------------------------------|---------------------------------------------------------------------------------|---------------------------------------------------------------------------------------|-------------------------------------------------------------------------------------------------------------------------------------------------------------------------------------------|
| 14       | 20.25    | 289.0710<br>291.0855                | -2.530<br>-2.867                 | Catechin<br>C <sub>15</sub> H <sub>14</sub> O <sub>6</sub>                      | 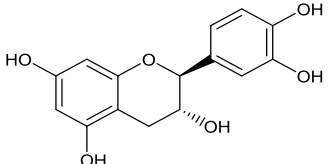   | Negative<br>179.0351 (15), 205.0505 (34), 245.0816 (100)                                                                                                                                  |
| 15a      | 20.57    | 577.1346<br>579.1479                | -0.917<br>-3.026                 | Procyanidin B<br>C <sub>30</sub> H <sub>26</sub> O <sub>12</sub>                |    | Negative<br>289.0719 (40), 407.0774 (76), 408.0805 (14),<br>425.0875 (100), 451.1033 (42), 559.1244 (10)                                                                                  |
| 15b      |          | 457.0776<br>459.0912                | -0.076<br>-3.633                 | Gallocatechin Gallate isomer<br>C <sub>22</sub> H <sub>18</sub> O <sub>11</sub> |    | Negative<br>166.9990 (15), 289.0718 (100), 413.0877 (17)                                                                                                                                  |
| 15c      |          | N/A<br>201.5167 <sup>(5)</sup>      | N/A<br>N/A                       | Unknown                                                                         |                                                                                       |                                                                                                                                                                                           |
| 16       | 20.69    | 865.1965<br>867.2111                | -2.320<br>-2.272                 | Procyanidin C<br>C <sub>45</sub> H <sub>38</sub> O <sub>18</sub>                |   | Negative<br>287.0569 (24), 407.0776 (38), 425.0890 (24),<br>543.0941 (20), 577.1364 (63), 587.1206 (24),<br>695.1427 (100), 713.1527 (31),<br>739.1671 (41), 847.1898 (14), 867.2060 (53) |
| 17       | 21.01    | 401.1453<br>425.1408 <sup>(6)</sup> | 0.049<br>-2.301                  | Benzyl alcohol<br>C <sub>18</sub> H <sub>26</sub> O <sub>10</sub>               |  | Negative<br>161.0454 (12), 269.1026 (100)                                                                                                                                                 |

| CAD Peak | RT (min) | Exp. <i>m/z</i> -, top +, bottom    | Mass Acc. (ppm) -, top +, bottom | Proposed ID<br>Molecular Formula                                                       | Structure                                                                             | High Resolution Fragments <sup>(1)</sup><br>( <i>m/z</i> intensity)                                                                                                        |
|----------|----------|-------------------------------------|----------------------------------|----------------------------------------------------------------------------------------|---------------------------------------------------------------------------------------|----------------------------------------------------------------------------------------------------------------------------------------------------------------------------|
| 18       | 21.14    | 652.1323 <sup>(5)</sup><br>N/A      | -0.803<br>N/A                    | Galloylated Procyanidin<br>(tetramer)                                                  | 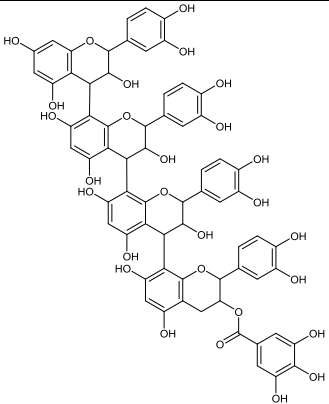   | Negative<br>289.0722 (43), 303.0516 (16), 407.0780 (8),<br>491.0976 (11), 567.1045 (23), 576.1116 (93),<br>727.1305 (44), 853.1628 (13), 1015.1936<br>(54), 1179.2414 (13) |
| 19       | 21.82    | 577.1350<br>579.1485                | -0.207<br>-2.111                 | Procyanidin B2<br>C <sub>30</sub> H <sub>26</sub> O <sub>12</sub>                      |    | Negative<br>289.0719 (40), 407.0774 (76), 408.0805 (14),<br>425.0875 (100), 451.1033 (42), 559.1244 (10)                                                                   |
| 20a      | 22.39    | 577.1344<br>579.1486                | -1.229<br>-1.973                 | Procyanidin B<br>C <sub>30</sub> H <sub>26</sub> O <sub>12</sub>                       |   | Negative<br>269.0455 (17), 289.0719 (24), 407.0774 (40),<br>425.0875 (100), 439.1030 (42),<br>451.1033 (21), 533.1451 (21), 559.1244 (23)                                  |
| 20b      |          | 521.2028<br>545.1978 <sup>(6)</sup> | -0.144<br>-2.903                 | Lariciresinol Glucoside<br>analogue<br>C <sub>26</sub> H <sub>34</sub> O <sub>11</sub> |  | Negative<br>359.1492 (100)                                                                                                                                                 |
| 20c      |          | N/A<br>219.1010                     | N/A<br>-2.468                    | C <sub>13</sub> H <sub>14</sub> O <sub>3</sub>                                         |                                                                                       | Positive<br>131.0858 (3), 159.0804 (14), 189.0911 (100),<br>191.1069 (16), 201.0913 (32)                                                                                   |

| CAD Peak | RT (min) | Exp. <i>m/z</i> -, top +, bottom    | Mass Acc. (ppm) -, top +, bottom | Proposed ID<br>Molecular Formula                                                                                         | Structure                                                                             | High Resolution Fragments <sup>(1)</sup><br>( <i>m/z</i> intensity)                                                                       |
|----------|----------|-------------------------------------|----------------------------------|--------------------------------------------------------------------------------------------------------------------------|---------------------------------------------------------------------------------------|-------------------------------------------------------------------------------------------------------------------------------------------|
| 21       | 22.73    | 577.1341<br>579.1487                | -1.801<br>-1.766                 | Procyanidin B<br>C <sub>30</sub> H <sub>26</sub> O <sub>12</sub>                                                         | 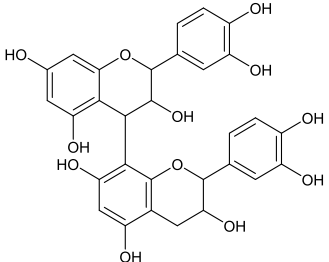   | Negative<br>269.0455 (17), 289.0719 (24), 407.0774 (40),<br>425.0875 (100), 439.1030 (42),<br>451.1033 (21), 533.1451 (21), 559.1244 (23) |
| 22       | 23.02    | 289.0714<br>291.0857                | -1.389<br>-2.180                 | Epicatechin<br>C <sub>15</sub> H <sub>14</sub> O <sub>6</sub>                                                            |    | Negative<br>179.0351 (15), 205.0505 (34), 245.0816 (100)                                                                                  |
| 23a      | 23.36    | 291.0873<br>293.1014                | -0.211<br>-1.995                 | 1-(3',4'-dihydroxy-phenyl)-3-(2'',4'',6''-trihydroxyphenyl)propan-2-ol<br>C <sub>15</sub> H <sub>16</sub> O <sub>6</sub> |    | Negative<br>123.0454 (10), 167.0351 (20), 205.0870 (13),<br>247.0974 (100), 291.0871 (13)                                                 |
| 23b      |          | 449.1088<br>473.1045 <sup>(6)</sup> | -0.344<br>-1.929                 | Dihydrokaempferol 3-O-β-D-glucoside<br>C <sub>21</sub> H <sub>22</sub> O <sub>11</sub>                                   |   | Negative<br>259.0614 (35), 269.0458 (27), 287.0560 (100)                                                                                  |
| 24a      | 23.54    | 457.0777<br>459.0912                | 0.078<br>-2.239                  | Epigallocatechin Gallate<br>C <sub>22</sub> H <sub>18</sub> O <sub>11</sub>                                              |  | Negative<br>169.0143 (100), 287.0559 (11),<br>305.0663 (34), 331.0454 (56)                                                                |

| CAD Peak | RT (min) | Exp. $m/z$<br>-, top<br>+, bottom    | Mass Acc. (ppm)<br>-, top<br>+, bottom | Proposed ID<br>Molecular Formula                           | Structure                                                                            | High Resolution Fragments <sup>(1)</sup><br>( $m/z$ intensity)                                                                                                                            |
|----------|----------|--------------------------------------|----------------------------------------|------------------------------------------------------------|--------------------------------------------------------------------------------------|-------------------------------------------------------------------------------------------------------------------------------------------------------------------------------------------|
| 24b      |          | 729.1448<br>731.1596                 | -1.725<br>-1.438                       | Galloylated Procyanidin<br>(dimer)<br>$C_{37}H_{30}O_{16}$ | 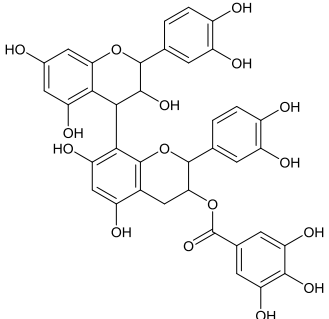  | Negative<br>407.0783 (34), 425.0890 (25),<br>559.1271 (37), 577.1355 (100)                                                                                                                |
| 24c      |          | 576.1269 <sup>(5)</sup><br>1155.2740 | -0.684<br>-2.102                       | Procyanidin (tetramer)<br>$C_{60}H_{50}O_{24}$             |   | Negative<br>287.0561 (24), 289.0715 (40), 449.0869 (15),<br>491.0986 (76), 500.1021 (100),<br>567.1210 (17), 701.1504 (11), 739.1631 (16),<br>863.1813 (47), 1027.2266 (33)               |
| 25       | 23.99    | 865.1970<br>867.2120                 | -1.765<br>-1.211                       | Procyanidin C<br>$C_{45}H_{38}O_{18}$                      |  | Negative<br>287.0569 (24), 407.0776 (38), 425.0890 (24),<br>543.0941 (20), 577.1364 (63), 587.1206 (24),<br>695.1427 (100), 713.1527 (31),<br>739.1671 (41), 847.1898 (14), 867.2060 (53) |

| CAD Peak | RT (min) | Exp. <i>m/z</i> -, top +, bottom     | Mass Acc. (ppm) -, top +, bottom | Proposed ID<br>Molecular Formula                                                       | Structure                                                                            | High Resolution Fragments <sup>(1)</sup><br>( <i>m/z</i> intensity)                                                                                                                       |
|----------|----------|--------------------------------------|----------------------------------|----------------------------------------------------------------------------------------|--------------------------------------------------------------------------------------|-------------------------------------------------------------------------------------------------------------------------------------------------------------------------------------------|
| 26a      | 24.24    | 865.1968<br>867.2114                 | -1.962<br>-1.996                 | Procyanidin C1<br>C <sub>45</sub> H <sub>38</sub> O <sub>18</sub>                      | 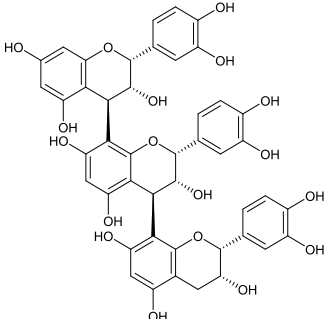  | Negative<br>287.0569 (24), 407.0776 (38), 425.0890 (24),<br>543.0941 (20), 577.1364 (63), 587.1206 (24),<br>695.1427 (100), 713.1527 (31),<br>739.1671 (41), 847.1898 (14), 867.2060 (53) |
| 26b      |          | 515.1920<br>539.1871 <sup>(6)</sup>  | -0.505<br>-3.150                 | Leptolepisol D<br>C <sub>27</sub> H <sub>32</sub> O <sub>10</sub>                      |   | Negative<br>195.0664 (18), 271.0972 (100), 319.1184<br>(51), 467.1702 (64)                                                                                                                |
| 27a      | 24.94    | 577.1349<br>579.1483                 | -0.432<br>-2.387                 | Procyanidin B<br>C <sub>30</sub> H <sub>26</sub> O <sub>12</sub>                       |   | Negative<br>289.0719 (40), 407.0774 (76), 408.0805 (14),<br>425.0875 (100), 451.1033 (42), 559.1244 (10)                                                                                  |
| 27b      |          | 508.1011 <sup>(5)</sup><br>1019.2260 | -0.117<br>1.865                  | Galloylated Procyanidin<br>(trimer)<br>C <sub>52</sub> H <sub>42</sub> O <sub>22</sub> |  | Negative<br>287.0562 (21), 423.0721 (100), 441.0822<br>(41), 575.1195 (23), 603.1149 (16),<br>729.1450 (36), 847.1861 (16), 891.1776 (52)                                                 |

| CAD Peak | RT (min) | Exp. $m/z$<br>-, top<br>+, bottom    | Mass Acc. (ppm)<br>-, top<br>+, bottom | Proposed ID<br>Molecular Formula                            | Structure                                                                            | High Resolution Fragments <sup>(1)</sup><br>( $m/z$ intensity)                                                                                     |
|----------|----------|--------------------------------------|----------------------------------------|-------------------------------------------------------------|--------------------------------------------------------------------------------------|----------------------------------------------------------------------------------------------------------------------------------------------------|
| 28a      | 25.07    | 729.1451<br>731.1588                 | -1.341<br>-2.532                       | Galloylated Procyanidin<br>(dimer)<br>$C_{37}H_{30}O_{16}$  | 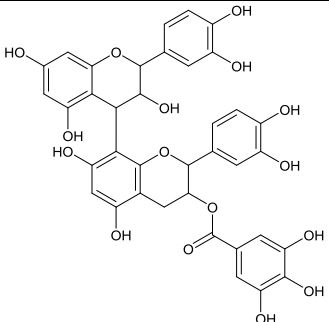  | Negative<br>289.0721 (30), 407.0775 (100), 441.0830 (39), 451.1035 (52), 559.0978 (30), 577.1410 (43), 603.1148 (47), 731.1519 (33)                |
| 28b      |          | 576.1270 <sup>(5)</sup><br>1155.2772 | -0.511<br>0.642                        | Procyanidin<br>(tetramer)<br>$C_{60}H_{50}O_{24}$           |   | Negative<br>287.0569 (33), 289.0720 (100), 407.0773 (57), 425.0876 (70), 451.1038 (50), 491.0986 (38), 500.1041 (62), 559.1296 (17), 863.1825 (56) |
| 29a      | 25.30    | 508.1010 <sup>(5)</sup><br>1019.2204 | -0.157<br>-3.580                       | Galloylated Procyanidin<br>(trimer)<br>$C_{52}H_{42}O_{22}$ |  | Negative<br>289.0716 (39), 303.0511 (100), 423.0713 (16), 432.0923 (51), 577.1347 (30), 695.1393 (52), 713.1497 (40), 727.1293 (30)                |



| CAD Peak | RT (min) | Exp. $m/z$ -, top +, bottom          | Mass Acc. (ppm) -, top +, bottom | Proposed ID<br>Molecular Formula                             | Structure                                                                            | High Resolution Fragments <sup>(1)</sup><br>( $m/z$ intensity)                                                                                       |
|----------|----------|--------------------------------------|----------------------------------|--------------------------------------------------------------|--------------------------------------------------------------------------------------|------------------------------------------------------------------------------------------------------------------------------------------------------|
| 29b      |          | 521.2027<br>545.1981 <sup>(6)</sup>  | -0.182<br>-2.335                 | Lariciresinol Glucosides<br>analogue<br>$C_{26}H_{34}O_{11}$ | 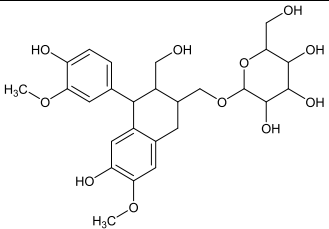  | Negative<br>359.1489 (100)                                                                                                                           |
| 30a      |          | 508.1007 <sup>(5)</sup><br>1019.2219 | -0.767<br>-2.148                 | Galloylated Procyanidin<br>(trimer)<br>$C_{52}H_{42}O_{22}$  |   | Negative<br>289.0716 (39), 303.0511 (100), 423.0713 (16), 432.0923 (51), 577.1347 (30), 695.1393 (52), 713.1497 (40), 727.1293 (30)                  |
| 30b      | 25.91    | 720.1577 <sup>(5)</sup><br>N/A       | -1.829<br>N/A                    | Procyanidin<br>(pentamer)<br>$C_{75}H_{62}O_{30}$            |  | Negative<br>289.0722 (52), 407.0778 (22), 559.1128 (25), 577.1348 (78), 635.6320 (100), 863.1835 (61), 865.1957 (51), 1153.2533 (33), 1316.2962 (28) |

| CAD Peak | RT (min) | Exp. $m/z$<br>-, top<br>+, bottom    | Mass Acc. (ppm)<br>-, top<br>+, bottom | Proposed ID<br>Molecular Formula                             | Structure                                                                             | High Resolution Fragments <sup>(1)</sup><br>( $m/z$ intensity)                                                                            |
|----------|----------|--------------------------------------|----------------------------------------|--------------------------------------------------------------|---------------------------------------------------------------------------------------|-------------------------------------------------------------------------------------------------------------------------------------------|
| 31       | 26.32    | 577.1347<br>579.1481                 | -0.848<br>-2.715                       | Procyanidin B<br>$C_{30}H_{26}O_{12}$                        | 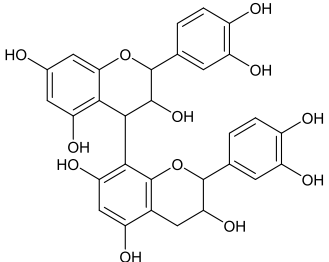   | Negative<br>269.0455 (17), 289.0719 (24), 407.0774 (40),<br>425.0875 (100), 439.1030 (42),<br>451.1033 (21), 533.1451 (21), 559.1244 (23) |
| 32a      | 27.37    | 508.1008 <sup>(5)</sup><br>1019.2223 | -0.649<br>-1.726                       | Galloylated Procyanidin<br>(trimer)<br>$C_{52}H_{42}O_{22}$  |    | Negative<br>289.0716 (39), 303.0511 (100), 423.0713<br>(16), 432.0923 (51), 577.1347 (30),<br>695.1393 (52), 713.1497 (40), 727.1293 (30) |
| 32b      |          | 609.1455<br>611.1591                 | -1.031<br>-2.620                       | Rutin<br>$C_{27}H_{30}O_{16}$                                |   | Negative<br>301.0349 (100), 343.0453 (7)<br>Positive<br>303.0500 (100), 465.1027 (29)                                                     |
| 32c      |          | 881.1556<br>883.1705                 | -1.653<br>-1.302                       | Digalloylated Procyanidin<br>(dimer)<br>$C_{44}H_{34}O_{20}$ |  | Negative<br>407.0778 (22), 441.0830 (6), 559.1328 (14),<br>603.1153 (6), 711.1359 (23), 729.1461 (100)                                    |

| CAD Peak | RT (min) | Exp. $m/z$<br>-, top<br>+, bottom | Mass Acc. (ppm)<br>-, top<br>+, bottom | Proposed ID<br>Molecular Formula                                                                                                             | Structure                                                                             | High Resolution Fragments <sup>(1)</sup><br>( $m/z$ intensity)                                           |
|----------|----------|-----------------------------------|----------------------------------------|----------------------------------------------------------------------------------------------------------------------------------------------|---------------------------------------------------------------------------------------|----------------------------------------------------------------------------------------------------------|
| 32d      | 28.00    | 579.1505<br>581.1642              | -0.448<br>-2.018                       | 2-(3,4-dihydroxy-phenyl)-4-(3-(3-(3,4-dihydroxyphenyl)-2-hydroxypropyl)-2,4,6-trihydroxyphenyl) chromane-3,5,7-triol<br>$C_{30}H_{28}O_{12}$ | 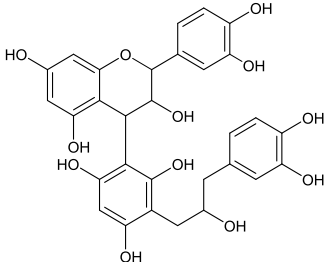   | Negative<br>287.0562 (5), 291.0871 (58), 409.0922 (100),<br>427.1028 (34), 453.1182 (59), 561.1400 (34)  |
| 32e      |          | 591.1507<br>593.1643              | -0.202<br>-1.758                       | Procyanidin B-type analogue<br>$C_{31}H_{28}O_{12}$                                                                                          |    | Negative<br>215.0716 (20), 257.0822 (9), 289.0720 (74),<br>301.0720 (81), 439.1037 (100), 547.1598 (14)  |
| 33a      |          | 441.0826<br>443.0961              | -0.272<br>-2.625                       | Epicatechin gallate<br>$C_{22}H_{18}O_{10}$                                                                                                  |   | Negative<br>169.0144 (17), 271.0609 (10),<br>289.0713 (100), 331.0454 (14)                               |
| 33b      |          | 577.1347<br>579.1481              | -0.831<br>-2.750                       | Procyanidin B<br>$C_{30}H_{26}O_{12}$                                                                                                        |  | Negative<br>289.0719 (40), 407.0774 (76), 408.0805 (14),<br>425.0875 (100), 451.1033 (42), 559.1244 (10) |

| CAD Peak | RT (min) | Exp. <i>m/z</i><br>-, top<br>+, bottom | Mass Acc. (ppm)<br>-, top<br>+, bottom | Proposed ID<br>Molecular Formula                                                       | Structure                                                                             | High Resolution Fragments <sup>(1)</sup><br>( <i>m/z</i> intensity)                                                                       |
|----------|----------|----------------------------------------|----------------------------------------|----------------------------------------------------------------------------------------|---------------------------------------------------------------------------------------|-------------------------------------------------------------------------------------------------------------------------------------------|
| 34a      | 28.41    | 441.0826<br>443.0959                   | -0.227<br>-3.054                       | Catechin gallate<br>C <sub>22</sub> H <sub>18</sub> O <sub>10</sub>                    | 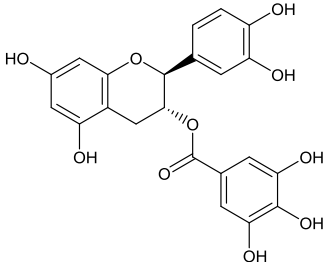   | Negative<br>169.0144 (17), 271.0609 (10),<br>289.0713 (100), 331.0454 (14)                                                                |
| 34b      |          | 508.1008 <sup>(5)</sup><br>1019.227    | -0.531<br>-1.304                       | Galloylated Procyanidin<br>(trimer)<br>C <sub>52</sub> H <sub>42</sub> O <sub>22</sub> |    | Negative<br>287.0561 (18), 413.0878 (14), 423.0720 (33),<br>432.0775 (100), 499.0954 (10),<br>575.1191 (22), 729.1450 (40), 891.1760 (47) |
| 34c      |          | 459.1267<br>461.1428                   | -3.993<br>-3.043                       | Embigenin<br>C <sub>23</sub> H <sub>24</sub> O <sub>10</sub>                           |   | Positive<br>323.0907 (4), 341.1022 (23), 365.1027 (11),<br>395.1131 (27), 407.1127 (8), 425.1236 (28),<br>443.1341 (100)                  |
| 35       | 66.70    | 455.3526<br>457.3665                   | -1.139<br>-2.475                       | Ursolic Acid<br>C <sub>30</sub> H <sub>48</sub> O <sub>3</sub>                         |  | Negative<br>407.3318 (100)<br>Positive<br>393.3510 (7), 411.3625 (100), 439.3576 (69)                                                     |
| 36       | 67.04    | 279.2329<br>281.2470                   | -0.048<br>-1.873                       | Linoleic Acid<br>C <sub>18</sub> H <sub>32</sub> O <sub>2</sub>                        |  | Negative<br>261.2222 (100)                                                                                                                |

| CAD Peak | RT (min) | Exp. $m/z$<br>-, top<br>+, bottom | Mass Acc. (ppm)<br>-, top<br>+, bottom | Proposed ID<br>Molecular Formula   | Structure                                                                           | High Resolution Fragments <sup>(1)</sup><br>( $m/z$ intensity)                                                                         |
|----------|----------|-----------------------------------|----------------------------------------|------------------------------------|-------------------------------------------------------------------------------------|----------------------------------------------------------------------------------------------------------------------------------------|
| 37       | 68.37    | 255.2332<br>257.2470              | 0.809<br>-1.931                        | Palmitic Acid<br>$C_{16}H_{32}O_2$ | 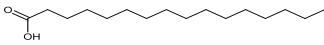 | Negative<br>237.2222 (100)                                                                                                             |
| 38       | 68.66    | 281.2488<br>283.2626              | 0.627<br>-1.860                        | Oleic Acid<br>$C_{18}H_{34}O_2$    |  | Negative<br>263.2378 (100)<br><br>Positive<br>185.1538 (6), 199.1696 (8), 213.1852 (8),<br>227.2011 (6), 247.2423 (26), 265.2528 (100) |
| 39       | 15-45    | -                                 | -                                      | Tannins                            |  |                                                                                                                                        |

(1) High resolution MS/MS experiments were performed using CID with a NCE of 30.

**Table S2.** Proposed identifications of components producing FID peaks in the GC-FID and GC-HRMS analysis of grape seed (*Vitis vinifera*) extract for GSE-1.

| Peak #                                                                                                                                                                                                                                                                     | Kovats Retention Index | Exp. $m/z$ <sup>(1)</sup><br>Mass Accuracy (ppm) | ID<br>Molecular Formula                                             | Structure                                                                           | High Resolution Fragments <sup>(2)</sup><br>( $m/z$ )      |
|----------------------------------------------------------------------------------------------------------------------------------------------------------------------------------------------------------------------------------------------------------------------------|------------------------|--------------------------------------------------|---------------------------------------------------------------------|-------------------------------------------------------------------------------------|------------------------------------------------------------|
| 1                                                                                                                                                                                                                                                                          | 732                    | 87.0441<br>(-0.006)                              | <i>Unidentified</i><br>C <sub>4</sub> H <sub>6</sub> O <sub>2</sub> |                                                                                     | 61.0284, 43.0178, 33.0335<br>45.0335, 42.0099              |
| 2                                                                                                                                                                                                                                                                          | 894                    | 91.0390<br>(0.192)                               | Dihydroxyacetone<br>C <sub>3</sub> H <sub>6</sub> O <sub>3</sub>    | 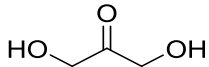 | 42.0098, 43.0177,<br>31.0179, 33.0335                      |
| 3                                                                                                                                                                                                                                                                          | 966                    | 91.0390<br>(0.039)                               | Glycerol<br>C <sub>3</sub> H <sub>8</sub> O <sub>3</sub>            |  | 61.0284, 43.0177, 44.0257                                  |
| 4                                                                                                                                                                                                                                                                          | 1188                   | 111.0441<br>(0.216)                              | Catechol<br>C <sub>6</sub> H <sub>6</sub> O <sub>2</sub>            |  | 110.0362, 81.0335, 82.0413,<br>63.0229, 64.0308, 92.0257   |
| 5                                                                                                                                                                                                                                                                          | 1284                   | 125.0597<br>(-0.288)                             | 4-methyl catechol<br>C <sub>7</sub> H <sub>8</sub> O <sub>2</sub>   |  | 124.0519, 78.0464, 43.0178,<br>95.0492, 106.0414, 107.0492 |
| 6                                                                                                                                                                                                                                                                          | 1362                   | 127.0390<br>(-0.084)                             | 1,2,3-benzenetriol<br>C <sub>6</sub> H <sub>6</sub> O <sub>3</sub>  |  | 126.0310, 108.0205, 80.0256,<br>97.0284, 50.0151, 39.0227  |
| 7                                                                                                                                                                                                                                                                          | 1593                   | 153.0543<br>(-1.768)                             | <i>Unidentified</i><br>C <sub>8</sub> H <sub>8</sub> O <sub>3</sub> |                                                                                     | 123.0440, 152.0468, 77.0389<br>105.0336, 95.0492           |
| 8                                                                                                                                                                                                                                                                          | 1801                   | 165.0544<br>(-1.579)                             | <i>Unidentified</i><br>C <sub>9</sub> H <sub>8</sub> O <sub>3</sub> |                                                                                     | 136.0520, 164.0468, 89.0386,<br>107.0492, 43.0177, 79.0543 |
| <p>(1) Experimental <math>m/z</math> was acquired by chemical ionization (CI) on a high resolution mass spectrometer. The values indicate [M+H]<sup>+</sup>.</p> <p>(2) Fragmentation was acquired by electron ionization (EI) on a high resolution mass spectrometer.</p> |                        |                                                  |                                                                     |                                                                                     |                                                            |
